# Supplementary material
Source: PubMed Central journal article supplement (PMC4517678)
Supplement: NIHMS694597-supplement-Supplement.pdf [file NIHMS694597-supplement-Supplement.pdf]

## Supplementary Online Content

Ossenkoppele R, Jansen WJ, Rabinovici GD, Knol DL, van der Flier WM, Verfaillie SCJ, et al. Prevalence of amyloid PET positivity in dementia syndromes: a meta-analysis. *JAMA*. doi: 10.1001/jama.2015.4669.

**eTable 1A.** Demographic and PET characteristics for patients with dementia

**eTable 1B.** Demographic and PET characteristics for healthy controls

**eTable 2A.** Quality assessment of PET cohorts including patients with dementia

**eTable 2B.** Quality assessment of PET cohorts with cognitively normal participants

**eTable 2C.** Quality checklist of STROBE and QUADAS items and its operationalization

**eTable 3.** Prevalence estimates according to age, diagnosis, and APOE  $\epsilon$ 4 status of published cohorts only

**eTable 4.** Prevalence of amyloid positivity on PET in subtypes of Alzheimer's disease and frontotemporal dementia

**eTable 5.** Characteristics of AD autopsy patients

**eTable 6.** Estimated and observed prevalence of amyloid on PET according to tracer, assessment and acquisition method

**eTable 7.** Heterogeneity assessment across age ranges for all diagnostic groups

**eFigure 1.** Flowchart of healthy control selection

**eFigure 2.** Heterogeneity plot across cohorts for AD and FTD

**eFigure 3.** Prevalence of amyloid-positivity on PET with 95% confidence intervals

**eMethods.** ADNI protocol

**eReferences**

This supplementary material has been provided by the authors to give readers additional information about their work.

**eTable 1A.** Demographic and PET characteristics for patients with dementia

| Cohort                            | Reference(s) | Diagnosis                      | N                          | Mean age (SD)                         | Median age (range)                                            | Setting                        | Tracer (N)                                                             | Outcome                                                             | Cut-point                                                   |
|-----------------------------------|--------------|--------------------------------|----------------------------|---------------------------------------|---------------------------------------------------------------|--------------------------------|------------------------------------------------------------------------|---------------------------------------------------------------------|-------------------------------------------------------------|
| AIBL                              | 1            | AD                             | 53                         | 72±9                                  | 73(55-91)                                                     | Memory clinic                  | [ <sup>11</sup> C]PIB                                                  | SUV <sub>r40-70</sub>                                               | 1.5 SUV <sub>r</sub>                                        |
| Amsterdam*                        | 2,3          | AD<br>FTD<br>DLB<br>VaD<br>CBS | 241<br>70<br>13<br>2<br>10 | 63±7<br>64±7<br>64±7<br>55±13<br>64±9 | 63(38-84)<br>65(43-78)<br>62(55-76)<br>55(46-64)<br>68(40-71) | Memory clinic                  | [ <sup>11</sup> C]PIB (243)<br><br>[ <sup>18</sup> F]Flutemetamol (93) | BP <sub>ND</sub><br>SUV <sub>r60-90</sub><br>SUV <sub>r90-110</sub> | Visual read                                                 |
| ADNI                              | 4,5          | AD                             | 163                        | 76±8                                  | 76(55-90)                                                     | Memory clinic                  | [ <sup>11</sup> C]PIB (17)<br>[ <sup>18</sup> F]Florbetapir (146)      | SUV <sub>r50-70</sub><br>SUV <sub>r50-70</sub>                      | 1.5 SUV <sub>r</sub><br>1.1 SUV <sub>r</sub>                |
| Melbourne*                        | 6-8          | AD<br>FTD<br>DLB<br>VaD        | 41<br>22<br>22<br>4        | 72±10<br>67±9<br>71±6<br>73±11        | 73(56-86)<br>64(53-82)<br>73(60-80)<br>73(61-85)              | Memory clinic                  | [ <sup>11</sup> C]PIB (44)<br><br>[ <sup>18</sup> F]Florbetaben (45)   | DVR<br>SUV <sub>r40-70</sub><br>SUV <sub>r90-110</sub>              | Visual read<br>1.5 SUV <sub>r</sub><br>1.4 SUV <sub>r</sub> |
| Melbourne                         | 9            | AD<br>FTD<br>CBS               | 41<br>46<br>19             | 68±6<br>68±9<br>67±6                  | 67(55-80)<br>70(49-82)<br>69(57-76)                           | Frontotemporal Dementia clinic | [ <sup>11</sup> C]PIB (106)                                            | SUV <sub>r40-70</sub>                                               | 1.5 SUV <sub>r</sub>                                        |
| Seoul NUH                         | 10           | AD                             | 27                         | 69±9                                  | 71(55-81)                                                     | Community study                | [ <sup>11</sup> C]PIB                                                  | SUV <sub>r60-90</sub>                                               | Visual read                                                 |
| Paris                             | 11           | AD                             | 21                         | 63±5                                  | 62(55-78)                                                     | Memory clinic                  | [ <sup>11</sup> C]PIB                                                  | SUV <sub>r50-70</sub>                                               | 1.4 SUV <sub>r</sub>                                        |
| Washington University (St. Louis) | 12           | AD                             | 25                         | 73±7                                  | 79(65-89)                                                     | Research Center                | [ <sup>11</sup> C]PIB                                                  | MCBP                                                                | 0.2 MCBP                                                    |
| Washington University (St. Louis) | 13           | DLB                            | 6                          | 71±9                                  | 69(61-87)                                                     | Movement disorder Center       | [ <sup>11</sup> C]PIB                                                  | MCBP                                                                | 0.2 MCBP                                                    |
| Seoul Samsung                     | 14           | AD<br>VaD                      | 69<br>70                   | 70±9<br>74±7                          | 72(39-88)<br>75(57-87)                                        | Memory clinic                  | [ <sup>11</sup> C]PIB                                                  | SUV <sub>r60-90</sub>                                               | 1.5 SUV <sub>r</sub>                                        |
| Leipzig                           | 15           | AD                             | 74                         | 70±8                                  | 72(55-86)                                                     | Memory clinic                  | [ <sup>18</sup> F]Florbetaben                                          | BAPL score on visual read                                           | 2 BAPL score                                                |

|                |       |                                |                         |                                     |                                                        |                   |                                                                   |                              |                                              |
|----------------|-------|--------------------------------|-------------------------|-------------------------------------|--------------------------------------------------------|-------------------|-------------------------------------------------------------------|------------------------------|----------------------------------------------|
| Leuven         | 16    | AD                             | 15                      | 73±7                                | 72(65-87)                                              | Memory clinic     | [ <sup>11</sup> C]PIB                                             | DVR                          | Visual read                                  |
| TU Munich      | 17,18 | AD<br>FTD                      | 41<br>7                 | 67±9<br>65±5                        | 66(51-84)<br>64(60-75)                                 | Research Unit     | [ <sup>11</sup> C]PIB                                             | SUV <sub>r40-70</sub>        | Visual read                                  |
| San Francisco* | 19    | AD<br>FTD<br>CBS               | 111<br>92<br>24         | 68±9<br>66±8<br>69±7                | 66(48-90)<br>67(47-85)<br>70(55-88)                    | Memory clinic     | [ <sup>11</sup> C]PIB (207)<br>[ <sup>18</sup> F]Florbetapir (20) | DVR<br>SUV <sub>r50-70</sub> | Visual read                                  |
| GE             | 20    | AD                             | 27                      | 70±7                                | 71(56-82)                                              | Memory clinic     | [ <sup>18</sup> F]Flutemetamol                                    | SUV <sub>r85-115</sub>       | Visual read                                  |
| Santander*     | 21    | AD<br>FTD<br>CBS               | 26<br>6<br>4            | 69±6<br>68±8<br>59±6                | 69(58-84)<br>71(53-77)<br>60(52-65)                    | Memory clinic     | [ <sup>11</sup> C]PIB                                             | SUV <sub>r55-60</sub>        | Visual read                                  |
| Hong Kong*     | 22    | VaD                            | 46                      | 77±8                                | 79(61-90)                                              | Neurology clinic  | [ <sup>11</sup> C]PIB                                             | SUV <sub>r35-45</sub>        | 1.46 SUV                                     |
| Tours          | 23    | AD                             | 14                      | 69±7                                | 69(56-81)                                              | Memory clinic     | [ <sup>18</sup> F]Florbetapir                                     | SUV <sub>r50-70</sub>        | Visual read                                  |
| Pittsburgh     | 24    | AD                             | 54                      | 71±10                               | 74(50-95)                                              | Memory clinic     | [ <sup>11</sup> C]PIB                                             | SUV <sub>r50-70</sub>        | 1.67 SUV <sub>r</sub><br>(atrophy corrected) |
| Freiburg*      | 25    | AD<br>FTD<br>DLB<br>VaD<br>CBS | 61<br>16<br>2<br>2<br>1 | 67±9<br>67±8<br>72±0<br>75±13<br>73 | 70(46-80)<br>68(53-79)<br>72(72-72)<br>75(67-84)<br>73 | Memory clinic     | [ <sup>11</sup> C]PIB                                             | BP <sub>ND</sub>             | Visual read                                  |
| Philadelphia   | 26    | AD                             | 21                      | 73±10                               | 75(56-86)                                              | Memory clinic     | [ <sup>18</sup> F]Florbetapir                                     | SUV <sub>r50-60</sub>        | Visual read                                  |
| Copenhagen     | 27    | AD<br>FTD                      | 18<br>11                | 63±6<br>66±12                       | 64(53-74)<br>68(42-82)                                 | Memory clinic     | [ <sup>11</sup> C]PIB                                             | SUV <sub>r40-70</sub>        | Visual read                                  |
| Phoenix        | 28    | AD                             | 45                      | 75±9                                | 77(52-88)                                              | 14 memory clinics | [ <sup>18</sup> F]Florbetapir                                     | SUV <sub>r50-60</sub>        | 1.08 SUV <sub>r</sub>                        |
| AVID           | 29    | AD<br>FTD<br>DLB<br>VaD<br>CBS | 48<br>5<br>3<br>5<br>1  | 78±7<br>63±5<br>75±6<br>78±10<br>76 | 79(61-91)<br>64(55-68)<br>75(68-80)<br>82(63-86)<br>76 | 19 memory clinics | [ <sup>18</sup> F]Florbetapir                                     | SUV <sub>r50-60</sub>        | Visual read                                  |
| Pennsylvania   | 30    | AD                             | 13                      | 68±10                               | 67(55-87)                                              | Memory clinic     | [ <sup>11</sup> C]PIB                                             | SUV <sub>r50-60</sub>        | Visual read                                  |

© 2015 American Medical Association. All rights reserved.

|           |               |     |    |       |            |               |                               |                       |                       |
|-----------|---------------|-----|----|-------|------------|---------------|-------------------------------|-----------------------|-----------------------|
| Stockholm | 31            | AD  | 26 | 68±9  | 68(55-84)  | Memory clinic | [ <sup>11</sup> C]PIB         | SUV <sub>r40-60</sub> | 1.41 SUV <sub>r</sub> |
| Turku*    | 32            | AD  | 37 | 66±8  | 65(51-85)  | Memory clinic | [ <sup>11</sup> C]PIB         | SUV <sub>r60-90</sub> | 1.5 SUV <sub>r</sub>  |
|           |               | FTD | 7  | 59±11 | 61(46-76)  |               |                               |                       |                       |
|           |               | DLB | 3  | 70±13 | 64(60-85)  |               |                               |                       |                       |
|           |               | VaD | 9  | 67±10 | 66(52-82)  |               |                               |                       |                       |
| Caen      | 33            | AD  | 18 | 70±11 | 70(53-88)  | Memory clinic | [ <sup>18</sup> F]Florbetapir | SUV <sub>r50-70</sub> | 1.1 SUV <sub>r</sub>  |
|           |               | FTD | 2  | 68±6  | 68(64-72)  |               |                               |                       |                       |
| Barcelona | Not published | AD  | 29 | 69±8  | 68(54-86)  | Memory clinic | [ <sup>11</sup> C]PIB         | SUV <sub>r60-90</sub> | Visual read           |
|           |               | FTD | 4  | 75±3  | 75 (71-77) |               |                               |                       |                       |
|           |               | DLB | 2  | 66±10 | 66(58-73)  |               |                               |                       |                       |
|           |               | CBS | 2  | 59±1  | 59(58-60)  |               |                               |                       |                       |

This table shows the primary paper(s), demographics, and PET characteristics for each cohort providing patient data for this meta-analysis.

AD = Alzheimer's disease; FTD = Frontotemporal dementia; VaD = Vascular dementia; DLB = Dementia with Lewy bodies; CBS = Corticobasal syndrome; PIB = Pittsburgh Compound-B; SUV<sub>r</sub> = Standardized uptake value ratio; DVR = Distribution volume ratio; BP<sub>ND</sub> = Non-displaceable binding potential; BAPL = Brain amyloid-beta plaque load; MCBP = Mean cortical binding potential.

\* Cohorts providing (unpublished) individual participant data in addition to published data.

**eTable 1B.** Demographic and PET characteristics for healthy controls

| Cohort                            | Reference(s) | N   | Mean age (SD) | Median age (range) | Setting         | Tracer (N)                                                        | Outcome                                                | Cut-point                                                   |
|-----------------------------------|--------------|-----|---------------|--------------------|-----------------|-------------------------------------------------------------------|--------------------------------------------------------|-------------------------------------------------------------|
| AIBL                              | 1            | 178 | 72±7          | 72(59-89)          | Memory clinic   | [ <sup>11</sup> C]PIB                                             | SUV <sub>r40-70</sub>                                  | 1.5 SUV <sub>r</sub>                                        |
| Amsterdam                         | 2            | 15  | 67±7          | 68(57-80)          | Memory clinic   | [ <sup>11</sup> C]PIB (15)                                        | BP <sub>ND</sub><br>SUV <sub>r60-90</sub>              | Visual read                                                 |
| ADNI                              | 4,5          | 323 | 75±7          | 75(56-94)          | Memory clinic   | [ <sup>11</sup> C]PIB (10)<br>[ <sup>18</sup> F]Florbetapir (313) | SUV <sub>r50-70</sub><br>SUV <sub>r50-70</sub>         | 1.5 SUV <sub>r</sub><br>1.1 SUV <sub>r</sub>                |
| Melbourne                         | 6            | 33  | 72±6          | 74(56-83)          | Memory clinic   | [ <sup>11</sup> C]PIB (10)<br>[ <sup>18</sup> F]Florbetaben (23)  | DVR<br>SUV <sub>r40-70</sub><br>SUV <sub>r90-110</sub> | Visual read<br>1.5 SUV <sub>r</sub><br>1.4 SUV <sub>r</sub> |
| Paris                             | 11           | 11  | 66±6          | 65(59-75)          | Memory clinic   | [ <sup>11</sup> C]PIB                                             | SUV <sub>r50-70</sub>                                  | 1.4 SUV <sub>r</sub>                                        |
| Washington University (St. Louis) | 12,34        | 441 | 67±10         | 67(45-89)          | Research center | [ <sup>11</sup> C]PIB                                             | MCBP                                                   | 0.2 MCBP                                                    |
| Seoul Samsung                     | 14           | 35  | 71±5          | 71(62-82)          | Memory clinic   | [ <sup>11</sup> C]PIB                                             | SUV <sub>r60-90</sub>                                  | 1.5 SUV <sub>r</sub>                                        |
| Leipzig                           | 15           | 68  | 68±7          | 69(55-85)          | Memory clinic   | [ <sup>18</sup> F]Florbetaben                                     | BAPL score on visual read                              | 2 BAPL score                                                |
| Leuven                            | 16           | 16  | 71±7          | 71(59-89)          | Memory clinic   | [ <sup>11</sup> C]PIB                                             | DVR                                                    | Visual read                                                 |
| GE                                | 20           | 25  | 56±18         | 58(25-78)          | Memory clinic   | [ <sup>18</sup> F]Flutemetamol                                    | SUV <sub>85-115</sub>                                  | Visual read                                                 |
| TU Munich                         | 18           | 15  | 64±7          | 65(53-75)          | Research Unit   | [ <sup>11</sup> C]PIB                                             | SUV <sub>r40-70</sub>                                  | Visual read                                                 |
| San Francisco                     | 35           | 10  | 62±9          | 62(48-73)          | Memory clinic   | [ <sup>11</sup> C]PIB (10)                                        | DVR                                                    | Visual read                                                 |
| Santander                         | 21           | 1   | 58            | 58                 | Memory clinic   | [ <sup>11</sup> C]PIB                                             | SUV <sub>r55-60</sub>                                  | Visual read                                                 |

|              |    |     |       |            |                   |                               |                       |                                              |
|--------------|----|-----|-------|------------|-------------------|-------------------------------|-----------------------|----------------------------------------------|
| Hong Kong    | 22 | 18  | 67±8  | 66(56-84)  | Neurology clinic  | [ <sup>11</sup> C]PIB         | SUV <sub>35-45</sub>  | 1.46 SUV                                     |
| Tours        | 23 | 21  | 68±10 | 67(60-109) | Memory clinic     | [ <sup>18</sup> F]Florbetapir | SUV <sub>r50-70</sub> | Visual read                                  |
| Pittsburgh   | 36 | 165 | 77±10 | 78(39-94)  | Memory clinic     | [ <sup>11</sup> C]PIB         | SUV <sub>r50-70</sub> | 1.67 SUV <sub>r</sub><br>(atrophy corrected) |
| Philadelphia | 26 | 27  | 65±14 | 66(38-91)  | Memory clinic     | [ <sup>18</sup> F]Florbetapir | SUV <sub>50-60</sub>  | Visual read                                  |
| Phoenix      | 28 | 147 | 45±22 | 39(18-92)  | 14 memory clinics | [ <sup>18</sup> F]Florbetapir | SUV <sub>r50-60</sub> | 1.08 SUV <sub>r</sub>                        |
| Pennsylvania | 30 | 14  | 70±9  | 69(59-87)  | Memory clinic     | [ <sup>11</sup> C]PIB         | SUV <sub>r50-60</sub> | Visual read                                  |
| Caen         | 33 | 81  | 54±19 | 59(21-84)  | Memory clinic     | [ <sup>18</sup> F]Florbetapir | SUV <sub>r50-70</sub> | 1.1 SUV <sub>r</sub>                         |
| Berkeley     | 37 | 81  | 75±7  | 74(61-96)  | Research Center   | [ <sup>11</sup> C]PIB         | DVR                   | 1.08 DVR                                     |
| Copenhagen   | 38 | 18  | 61±7  | 61(51-75)  | Research Center   | [ <sup>11</sup> C]PIB         | SUV <sub>r40-70</sub> | 1.5 SUV <sub>r</sub>                         |
| Dallas       | 39 | 106 | 71±11 | 75(55-85)  | Research Center   | [ <sup>18</sup> F]Florbetapir | SUV <sub>r50-60</sub> | 1.22 SUV <sub>r</sub>                        |

This table shows the primary paper(s), demographics, and PET characteristics for each cohort providing healthy control data for this meta-analysis.

SUV<sub>r</sub> = Standardized uptake value ratio; DVR = Distribution volume ratio; BP<sub>ND</sub> = Non-displaceable binding potential; BAPL = Brain amyloid-beta plaque load; MCBP = Mean cortical binding potential.

**eTable 2A. Quality assessment of PET cohorts including patients with dementia**

|                                   |                     | <b>STROBE/QUADAS criterion*</b> |                         |                  |                     |                  |             |                     |                     |                |                        |
|-----------------------------------|---------------------|---------------------------------|-------------------------|------------------|---------------------|------------------|-------------|---------------------|---------------------|----------------|------------------------|
| <b>Cohort</b>                     | <b>Reference(s)</b> | <b>Setting</b>                  | <b>Generalizability</b> | <b>Selection</b> | <b>Measurements</b> | <b>Reference</b> | <b>Bias</b> | <b>Subject flow</b> | <b>Descriptives</b> | <b>Outcome</b> | <b>Dichotimization</b> |
| AIBL                              | 1                   | yes                             | yes                     | yes              | yes                 | yes              | NA          | yes                 | yes                 | yes            | yes                    |
| Amsterdam                         | 2                   | yes                             | yes                     | yes              | yes                 | yes              | yes         | yes                 | yes                 | yes            | yes                    |
|                                   | 3                   | yes                             | yes                     | yes              | yes                 | yes              | yes         | yes                 | yes                 | yes            | yes                    |
| ADNI                              | 4                   | yes                             | yes                     | yes              | yes                 | yes              | NA          | yes                 | yes                 | yes            | yes                    |
|                                   | 5                   | yes                             | yes                     | yes              | yes                 | yes              | NA          | yes                 | yes                 | yes            | yes                    |
| Melbourne                         | 6                   | yes                             | yes                     | yes              | yes                 | yes              | yes         | yes                 | yes                 | yes            | yes                    |
|                                   | 7                   | yes                             | yes                     | yes              | yes                 | yes              | NA          | yes                 | yes                 | yes            | yes                    |
|                                   | 8                   | yes                             | yes                     | yes              | yes                 | yes              | NA          | yes                 | yes                 | yes            | yes                    |
| Melbourne                         | 9                   | yes                             | yes                     | yes              | yes                 | yes              | NA          | yes                 | yes                 | yes            | yes                    |
| Seoul NUH                         | 10                  | yes                             | yes                     | yes              | yes                 | yes              | NA          | yes                 | yes                 | yes            | yes                    |
| Paris                             | 11                  | yes                             | yes                     | yes              | yes                 | yes              | NA          | yes                 | yes                 | yes            | yes                    |
| Washington University (St. Louis) | 12                  | yes                             | yes                     | yes              | yes                 | yes              | yes         | yes                 | yes                 | yes            | yes                    |
| Washington University (St. Louis) | 13                  | yes                             | yes                     | yes              | yes                 | yes              | NA          | yes                 | yes                 | yes            | yes                    |
| Seoul Samsung                     | 14                  | yes                             | yes                     | yes              | yes                 | yes              | NA          | yes                 | yes                 | yes            | yes                    |
| Leipzig                           | 15                  | yes                             | yes                     | yes              | yes                 | yes              | yes         | yes                 | yes                 | yes            | yes                    |
| Leuven                            | 16                  | yes                             | yes                     | yes              | yes                 | yes              | NA          | yes                 | yes                 | yes            | yes                    |
| TU Munich                         | 17                  | yes                             | yes                     | yes              | yes                 | yes              | NA          | yes                 | yes                 | yes            | yes                    |

|               |               |     |     |     |     |     |     |     |     |     |     |
|---------------|---------------|-----|-----|-----|-----|-----|-----|-----|-----|-----|-----|
|               |               |     |     |     |     |     |     |     |     |     |     |
|               | 18            | yes | yes | yes | yes | yes | NA  | yes | yes | yes | yes |
| San Francisco | 19            | yes |
| GE            | 20            | yes |
| Santander     | 21            | yes |
| Hong Kong     | 22            | yes |
| Tours         | 23            | yes | yes | yes | yes | yes | NA  | yes | yes | yes | yes |
| Pittsburgh    | 24            | yes | yes | yes | yes | yes | NA  | yes | yes | yes | yes |
| Freiburg      | 25            | yes | yes | yes | yes | yes | NA  | yes | yes | yes | yes |
| Philadelphia  | 26            | yes |
| Copenhagen    | 27            | yes |
| Phoenix       | 28            | yes | yes | yes | yes | yes | NA  | yes | yes | yes | yes |
| AVID          | 29            | yes |
| Pennsylvania  | 30            | yes | yes | yes | yes | yes | NA  | yes | yes | yes | yes |
| Stockholm     | 31            | yes | yes | yes | yes | yes | NA  | yes | yes | yes | yes |
| Turku         | 32            | yes | yes | yes | yes | yes | NA  | yes | yes | yes | yes |
| Caen          | 33            | yes |
| Barcelona     | Not published |     |     |     |     |     |     |     |     |     |     |

\* The quality of the primary paper(s) from cohorts that provided participant level data of patients with dementia was assessed using STROBE and QUADAS items (see below for detailed explanation).

NA= not available from the report.



**eTable 2B. Quality assessment of PET cohorts with cognitively normal participants**

|                                   |                     | <b>STROBE/QUADAS criterion*</b> |                         |                  |                     |                  |             |                     |                     |                |                        |
|-----------------------------------|---------------------|---------------------------------|-------------------------|------------------|---------------------|------------------|-------------|---------------------|---------------------|----------------|------------------------|
| <b>Cohort</b>                     | <b>Reference(s)</b> | <b>Setting</b>                  | <b>Generalizability</b> | <b>Selection</b> | <b>Measurements</b> | <b>Reference</b> | <b>Bias</b> | <b>Subject flow</b> | <b>Descriptives</b> | <b>Outcome</b> | <b>Dichotimization</b> |
| AIBL                              | 1                   | yes                             | yes                     | yes              | yes                 | yes              | NA          | yes                 | yes                 | yes            | yes                    |
| Amsterdam                         | 2                   | yes                             | yes                     | yes              | yes                 | yes              | yes         | yes                 | yes                 | yes            | yes                    |
| ADNI                              | 5                   | yes                             | yes                     | yes              | yes                 | yes              | NA          | yes                 | yes                 | yes            | yes                    |
|                                   | 4                   | yes                             | yes                     | yes              | yes                 | yes              | NA          | yes                 | yes                 | yes            | yes                    |
| Melbourne                         | 6                   | yes                             | yes                     | yes              | yes                 | yes              | NA          | yes                 | yes                 | yes            | yes                    |
| Paris                             | 11                  | yes                             | yes                     | yes              | yes                 | yes              | NA          | yes                 | yes                 | yes            | yes                    |
| Washington University (St. Louis) | 34                  | yes                             | yes                     | yes              | yes                 | yes              | yes         | yes                 | yes                 | yes            | yes                    |
|                                   | 12                  | yes                             | yes                     | yes              | yes                 | yes              | yes         | yes                 | yes                 | yes            | yes                    |
| Seoul Samsung                     | 14                  | yes                             | yes                     | yes              | yes                 | yes              | NA          | yes                 | yes                 | yes            | yes                    |
| Leipzig                           | 15                  | yes                             | yes                     | yes              | yes                 | yes              | yes         | yes                 | yes                 | yes            | yes                    |
| Leuven                            | 16                  | yes                             | yes                     | yes              | yes                 | yes              | NA          | yes                 | yes                 | yes            | yes                    |
| GE                                | 20                  | yes                             | yes                     | yes              | yes                 | yes              | yes         | yes                 | yes                 | yes            | yes                    |
| TU Munich                         | 18                  | yes                             | yes                     | yes              | yes                 | yes              | NA          | yes                 | yes                 | yes            | yes                    |
| San Francisco                     | 35                  | yes                             | yes                     | yes              | yes                 | yes              | NA          | yes                 | yes                 | yes            | yes                    |
| Santander                         | 21                  | yes                             | yes                     | yes              | yes                 | yes              | yes         | yes                 | yes                 | yes            | yes                    |
| Hong Kong                         | 22                  | yes                             | yes                     | yes              | yes                 | yes              | yes         | yes                 | no                  | yes            | yes                    |
| Tours                             | 23                  | yes                             | yes                     | yes              | yes                 | yes              | NA          | yes                 | yes                 | yes            | yes                    |
| Pittsburgh                        | 36                  | yes                             | yes                     | yes              | yes                 | yes              | NA          | yes                 | yes                 | yes            | yes                    |

© 2015 American Medical Association. All rights reserved.

|              |    |     |     |     |     |     |     |     |     |     |     |     |
|--------------|----|-----|-----|-----|-----|-----|-----|-----|-----|-----|-----|-----|
| Philadelphia | 26 | yes |
| Phoenix      | 28 | yes | yes | yes | yes | yes | NA  | yes | yes | yes | yes | yes |
| Pennsylvania | 30 | yes | yes | yes | yes | yes | NA  | yes | yes | yes | yes | yes |
| Caen         | 33 | yes |
| Berkeley     | 37 | yes |
| Copenhagen   | 38 | yes | yes | yes | yes | yes | NA  | yes | yes | yes | yes | yes |
| Dallas       | 39 | yes | yes | yes | yes | yes | NA  | yes | yes | yes | yes | yes |

\* The quality of the primary paper(s) from cohorts that provided participant level data of healthy controls was assessed using STROBE and QUADAS items (see below for detailed explanation).

NA= not available from the report.

**eTable 2C. Quality checklist of STROBE and QUADAS items and its operationalization**

| <b>Criterion</b> | <b>STROBE<sup>40</sup><br/>item(s)</b> | <b>QUADAS<sup>41</sup><br/>item(s)</b> | <b>Operationalization</b>                                                                                                                                                        |
|------------------|----------------------------------------|----------------------------------------|----------------------------------------------------------------------------------------------------------------------------------------------------------------------------------|
| Setting          | 5                                      |                                        | Description of study setting and recruitment strategy.                                                                                                                           |
| Generalizability |                                        | 1                                      | Representativeness of spectrum of participants who will receive the test in practice or in research projects.                                                                    |
| Selection        | 6                                      | 2                                      | Description of inclusion criteria and sampling method.                                                                                                                           |
| Measurements     | 7, 8, 11                               | 8, 9                                   | Detailed description of amyloid assessment method and diagnostic criteria.                                                                                                       |
| Reference        |                                        | 3                                      | Appropriate method of amyloid assessment.                                                                                                                                        |
| Bias             | 9                                      | 7, 10, 11                              | Indication that the clinician responsible for the clinical diagnosis was blinded for amyloid status, and that amyloid measurements were interpreted independent of risk factors. |
| Subject flow     | 13                                     | 5, 6, 13, 14                           | Explanation of non-participation at each stage.                                                                                                                                  |
| Descriptives     | 14                                     | 1                                      | Characterization of participants.                                                                                                                                                |
| Outcome          | 15                                     |                                        | Report of prevalence data.                                                                                                                                                       |
| Dichotomization  | 16                                     | 8, 9                                   | Description of cutoff for amyloid positivity.                                                                                                                                    |

Each criterion was rated “yes” when criterion was met, not available (“NA”) when not reported and “no” when criterion was not met.

**eTable 3.** Prevalence estimates according to age, diagnosis, and APOE ε4 status of published cohorts only

|            | Age (years) |    |             |     |             |     |             |     |             |    |             |      |
|------------|-------------|----|-------------|-----|-------------|-----|-------------|-----|-------------|----|-------------|------|
|            | 50          | n  | 60          | n   | 70          | n   | 80          | n   | 90          | n  | ALL         | n    |
| <b>AD</b>  | 93% (90-95) | 57 | 91% (89-93) | 359 | 89% (85-91) | 501 | 84% (81-87) | 354 | 79% (73-85) | 68 | 88% (85-90) | 1330 |
| APOE ε4+   | 97% (92-99) | 18 | 96% (94-98) | 149 | 95% (92-96) | 239 | 92% (89-95) | 159 | 90% (83-94) | 21 | 95% (90-96) | 586  |
| APOE ε4-   | 86% (73-94) | 22 | 84% (77-90) | 112 | 78% (71-85) | 102 | 72% (65-79) | 96  | 66% (50-76) | 32 | 78% (71-85) | 364  |
| <b>FTD</b> | 6% (3-14)   | 25 | 9% (6-15)   | 99  | 15% (12-19) | 123 | 19% (11-32) | 36  | -           | 1  | 12% (8-19)  | 284  |
| APOE ε4+   | 11% (6-22)  | 5  | 19% (12-28) | 18  | 33% (26-41) | 21  | 43% (35-50) | 3   | -           | 0  | 20% (17-34) | 46   |
| APOE ε4-   | 3% (1-6)    | 10 | 5% (3-8)    | 51  | 9% (6-12)   | 73  | 15% (11-19) | 23  | -           | 1  | 10% (6-13)  | 158  |
| <b>DLB</b> | -           | 0  | 44% (27-63) | 15  | 51% (39-61) | 22  | 58% (34-78) | 10  | -           | 2  | 50% (31-67) | 49   |
| APOE ε4+   | -           | 0  | 63% (56-74) | 4   | 75% (65-83) | 9   | 83% (67-92) | 3   | -           | 0  | 69% (58-85) | 16   |
| APOE ε4-   | -           | 0  | 27% (18-44) | 7   | 38% (29-47) | 3   | 54% (30-77) | 5   | -           | 1  | 44% (23-60) | 18   |
| <b>CBS</b> | -           | 2  | 41% (28-56) | 20  | 35% (23-49) | 31  | 28% (13-51) | 5   | -           | 1  | 37% (22-53) | 59   |
| APOE ε4+   | -           | 2  | 67% (49-82) | 5   | 63% (57-68) | 9   | -           | 1   | -           | 0  | 53% (48-77) | 17   |
| APOE ε4-   | -           | 0  | 30% (18-44) | 15  | 27% (22-34) | 14  | -           | 2   | -           | 1  | 35% (19-42) | 32   |

This Table is similar to Table 2 in the main paper, except that here only data from published cohorts (28/29 cohorts, excluding 29 AD, 4 FTD, 2 DLB and 2 CBS patients) are presented. All VaD patients and Controls come from published cohorts and are therefore not included in this Table. This analysis yielded highly similar results compared to the data presented in Table 2.

Data represent prevalence estimates (95% confidence interval) derived from generalized estimating equation models. The models included amyloid status (+ or -), age, diagnosis, the interaction age \* diagnosis, and APOE status (+ or -) when appropriate. The analysis was adjusted for study effects. No estimates were provided if the 5-year range around the indicated column age included <3 patients. Variable “n” indicates the number of participants within the 5-year range around the indicated column ages 60, 70 and 80 (e.g. for age=60, all participants between 55 and 64 were counted). For column ages 50 and 90 all participants <55 and >85 were counted, and variable “ALL” includes the entire age range.

AD = Alzheimer disease; FTD = Frontotemporal dementia; DLB = Dementia with Lewy bodies; CBS = Corticobasal syndrome; APOE = Apolipoprotein E.

**eTable 4.** Prevalence of amyloid positivity on PET in subtypes of Alzheimer’s disease and frontotemporal dementia

|                                              | <b>Observed probability<br/>(N amyloid positive/total patients)</b> | <b>GEE estimated probability<br/>(95% CI)</b> |
|----------------------------------------------|---------------------------------------------------------------------|-----------------------------------------------|
| <b>Alzheimer’s disease subtype</b>           |                                                                     |                                               |
| Posterior cortical atrophy                   | 96% (52/54)                                                         | 96% (89-99)                                   |
| Logopenic primary aphasia                    | 90% (63/70)                                                         | 90% (84-94)                                   |
| <b>Frontotemporal dementia (FTD) subtype</b> |                                                                     |                                               |
| Semantic dementia                            | 11% (7/62)                                                          | 11% (7-19)                                    |
| Progressive non-fluent aphasia               | 15% (9/59)                                                          | 15% (11-21)                                   |
| Behavioral variant FTD                       | 13% (3/24)                                                          | 13% (6-24)                                    |

Observed and estimated (using generalized estimating equations, GEE) probabilities of amyloid PET positivity in different subtypes of Alzheimer’s disease and frontotemporal dementia.

**eTable 5.** Characteristics of AD autopsy patients

| <b>NACC AD autopsy patients</b>        |                |
|----------------------------------------|----------------|
| <i>(n=1369)</i>                        |                |
| Age – yr                               | 81.7±10.4      |
| Age – median (range)                   | 83 (37-111)    |
| Age groups – no. (%)                   |                |
| <55                                    | 21 (1.5)       |
| 55-59                                  | 27 (2.0)       |
| 60-64                                  | 48 (3.5)       |
| 65-69                                  | 83 (6.1)       |
| 70-74                                  | 109 (8.0)      |
| 75-79                                  | 192 (14.0)     |
| 80-84                                  | 268 (19.6)     |
| ≥ 85                                   | 621 (45.4)     |
| Male – no. (%)                         | 743 (54.3)     |
| Education – yr                         | 14.8±3.4       |
| MMSE score                             | 16.1±6.6       |
| APOE ε4 carrier/non-carrier – no. (%)* | 491/501 (49.5) |

Data are presented as mean ± SD or number (%), unless indicated otherwise.

NACC = National Alzheimer's Coordinating Center; AD = Alzheimer's disease; MMSE = Mini-mental state examination; APOE = Apolipoprotein E.

\* APOE data missing in 27.5% of patients

**eTable 6.** Estimated and observed prevalence of amyloid on PET according to tracer, assessment and acquisition method

|                                 | N    | AD             |                  | FTD            |                 | VaD            |                 | DLB            |                | CBS            |                |
|---------------------------------|------|----------------|------------------|----------------|-----------------|----------------|-----------------|----------------|----------------|----------------|----------------|
|                                 |      | GEE            | Observed         | GEE            | Observed        | GEE            | Observed        | GEE            | Observed       | GEE            | Observed       |
| <b>Tracer</b>                   |      |                |                  |                |                 |                |                 |                |                |                |                |
| [ <sup>11</sup> C]PIB           | 1330 | 89%<br>(87-91) | 90%<br>(771/860) | 10%<br>(7-14)  | 11%<br>(26/248) | 28%<br>(21-37) | 30%<br>(37/127) | 60%<br>(44-73) | 58%<br>(23/40) | 36%<br>(24-50) | 40%<br>(22/55) |
| [ <sup>18</sup> F]florbetapir   | 328  | 85%<br>(80-89) | 83%<br>(249/301) | 36%<br>(16-62) | 33%<br>(5/15)   | -              | -               | -              | -              | -              | -              |
| <b>Assessment</b>               |      |                |                  |                |                 |                |                 |                |                |                |                |
| Visual                          | 1123 | 90%<br>(88-92) | 88%<br>(656/747) | 10%<br>(6-14)  | 11%<br>(26/233) | 24%<br>(17-32) | 27%<br>(16-59)  | 53%<br>(36-67) | 52%<br>(22/42) | 36%<br>(24-50) | 38%<br>(16/42) |
| Quantitative                    | 774  | 88%<br>(85-90) | 88%<br>(537/612) | 16%<br>(9-27)  | 16%<br>(9/55)   | 31%<br>(23-40) | 33%<br>(26/79)  | -              | -              | 37%<br>(22-54) | 37%<br>(7/19)  |
| <b>Data acquisition</b>         |      |                |                  |                |                 |                |                 |                |                |                |                |
| Static (SUVr)                   | 1318 | 89%<br>(87-91) | 88%<br>(843/957) | 12%<br>(8-16)  | 12%<br>(20/164) | 29%<br>(22-38) | 30%<br>(41/136) | 41%<br>(25-55) | 40%<br>(10/25) | 34%<br>(21-48) | 36%<br>(13/36) |
| Dynamic (DVR/BP <sub>ND</sub> ) | 579  | 87%<br>(84-89) | 87%<br>(350/402) | 11%<br>(6-16)  | 12%<br>(15/124) | -              | -               | 61%<br>(43-75) | 62%<br>(16/26) | 32%<br>(18-48) | 40%<br>(10/25) |



The estimated (95% confidence interval) and observed (n amyloid positive PET scan/total n) prevalence of amyloid-positivity according to tracer, assessment and data acquisition were presented if  $\geq 10$  data points are available. PET tracers [ $^{18}\text{F}$ ]flutemetamol and [ $^{18}\text{F}$ ]florbetaben were not assessed due to relatively small numbers within each cell. None of the differences in prevalence estimates according to tracer, assessment or data acquisition reached significance.

AD = Alzheimer's disease; FTD = Frontotemporal dementia; VaD = Vascular dementia; DLB = Dementia with Lewy bodies; CBS = Corticobasal syndrome; PIB = Pittsburgh Compound-B; SUVR = Standardized uptake value ratio; DVR = Distribution volume ratio;  $\text{BP}_{\text{ND}}$  = Non-displaceable binding potential.

**eTable 7.** Heterogeneity assessment across age ranges for all diagnostic groups

| Age   | Measure            | AD   | FTD  | VaD   | DLB  | CBS |
|-------|--------------------|------|------|-------|------|-----|
| <60   | I <sup>2</sup> (%) | 0    | 0    | 0     | 33.3 | 0   |
|       | # Cohorts          | 24   | 8    | 3     | 2    | 5   |
| 60-70 | I <sup>2</sup> (%) | 19.9 | 0    | 0     | 0    | 0   |
|       | # Cohorts          | 27   | 11   | 7     | 5    | 5   |
| 70-80 | I <sup>2</sup> (%) | 20.5 | 24.2 | 0     | 0    | 0   |
|       | # Cohorts          | 27   | 11   | 5     | 6    | 5   |
| 80+   | I <sup>2</sup> (%) | 0    | 0    | 60.7* | 0    | -   |
|       | # Cohorts          | 25   | 4    | 6     | 4    | 1   |
| ALL   | I <sup>2</sup> (%) | 0    | 0    | 33.8  | 0    | 0   |
|       | # Cohorts          | 27   | 12   | 7     | 7    | 7   |

I<sup>2</sup> statistics and prevalence estimates were obtained from random-effects meta-analyses. Prevalence estimates with 95% confidence intervals represents the mean across cohorts for each age group, weighed for the number of participants per cohort. I<sup>2</sup> statistic value greater than 50% was considered significant heterogeneity (\*, VaD 80+ group only). This analysis indicates that heterogeneity is limited, suggesting that pooling data across cohorts is justified.

**eFigure 1.** Flowchart of healthy control selection

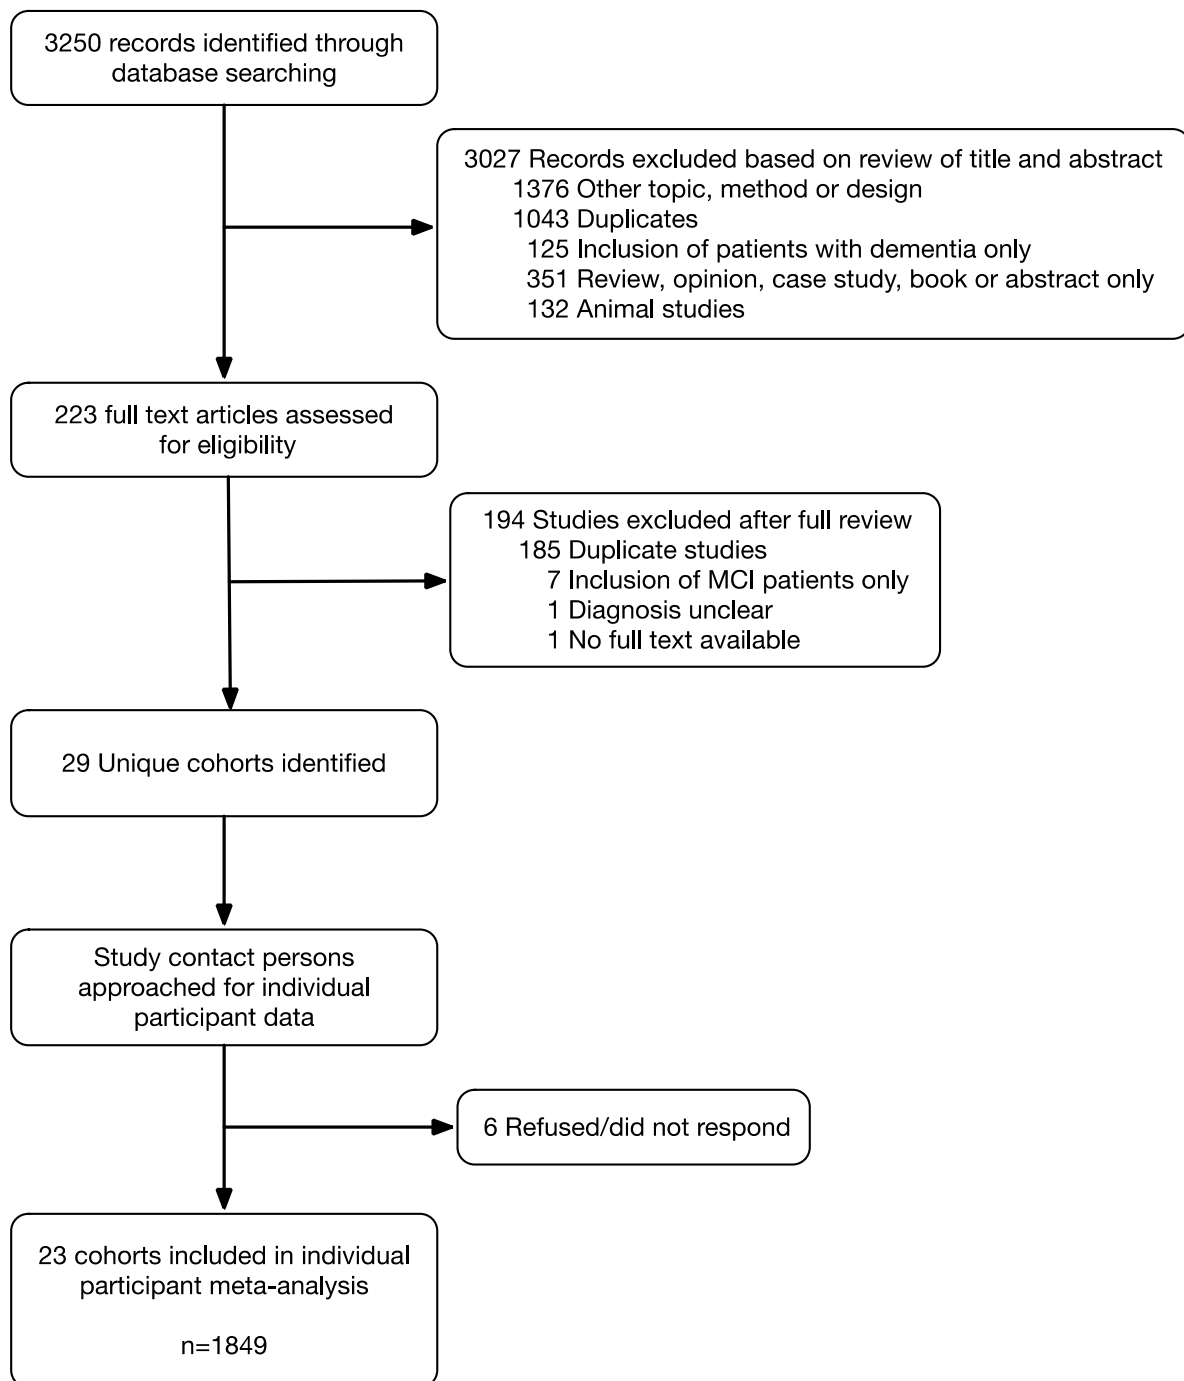

MEDLINE and Web of Science databases were searched from 2004 to April 2015 and yielded 3250 hits. The flow diagram shows how 29 unique cohorts were identified that applied amyloid imaging with PET in healthy controls. 23 cohorts were included in the final meta-analysis, comprising individual participant data from 1849 participants.

**eFigure 2.** Heterogeneity plot across cohorts for AD and FTD

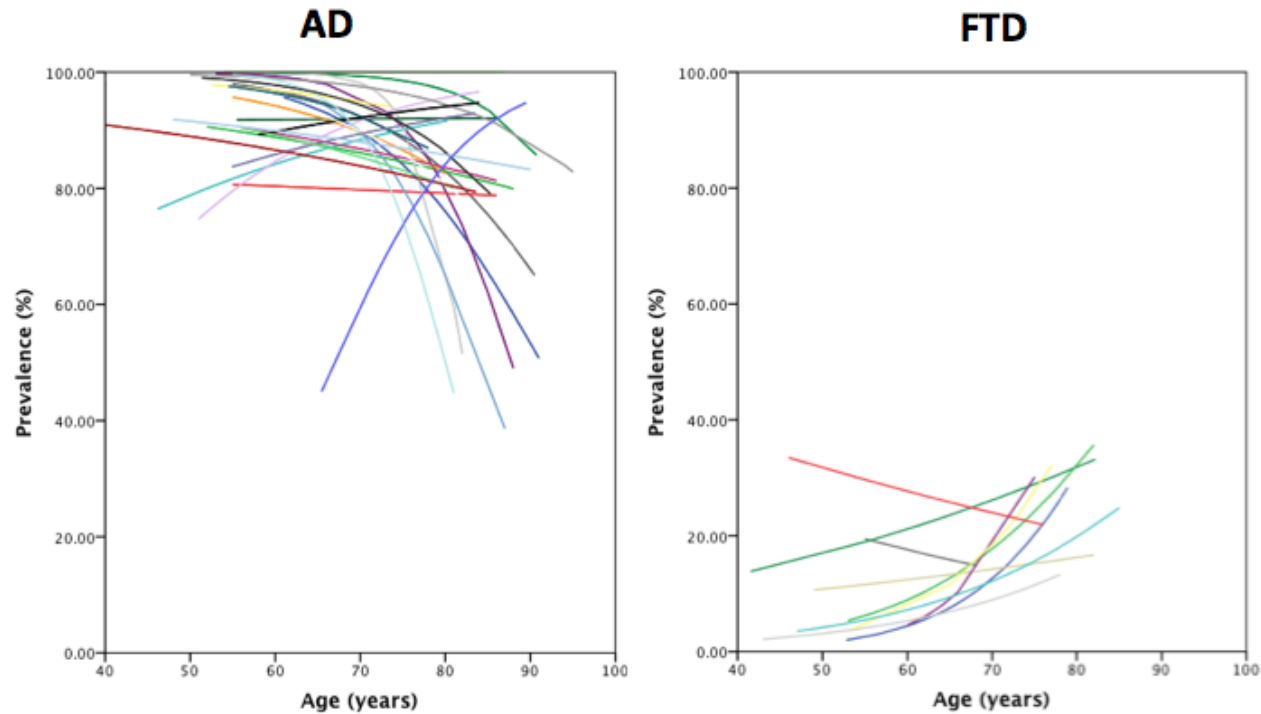

Prevalence estimates of amyloid-positivity across Alzheimer's disease (left, AD, n=27 cohorts) and Frontotemporal dementia (right, FTD, n=12 cohorts) cohorts as generated with estimating equations models. Only cohorts with more than 5 patients per diagnostic group were included. Plots for Vascular dementia, Dementia with Lewy bodies and corticobasal syndroms were not shown due to the small number of cohorts (n=7 for all) and limited sample sizes (n=138, 51 and 61, respectively).

**eFigure 3.** Prevalence of amyloid-positivity on PET with 95% confidence intervals

**A. ALL diagnostic groups**

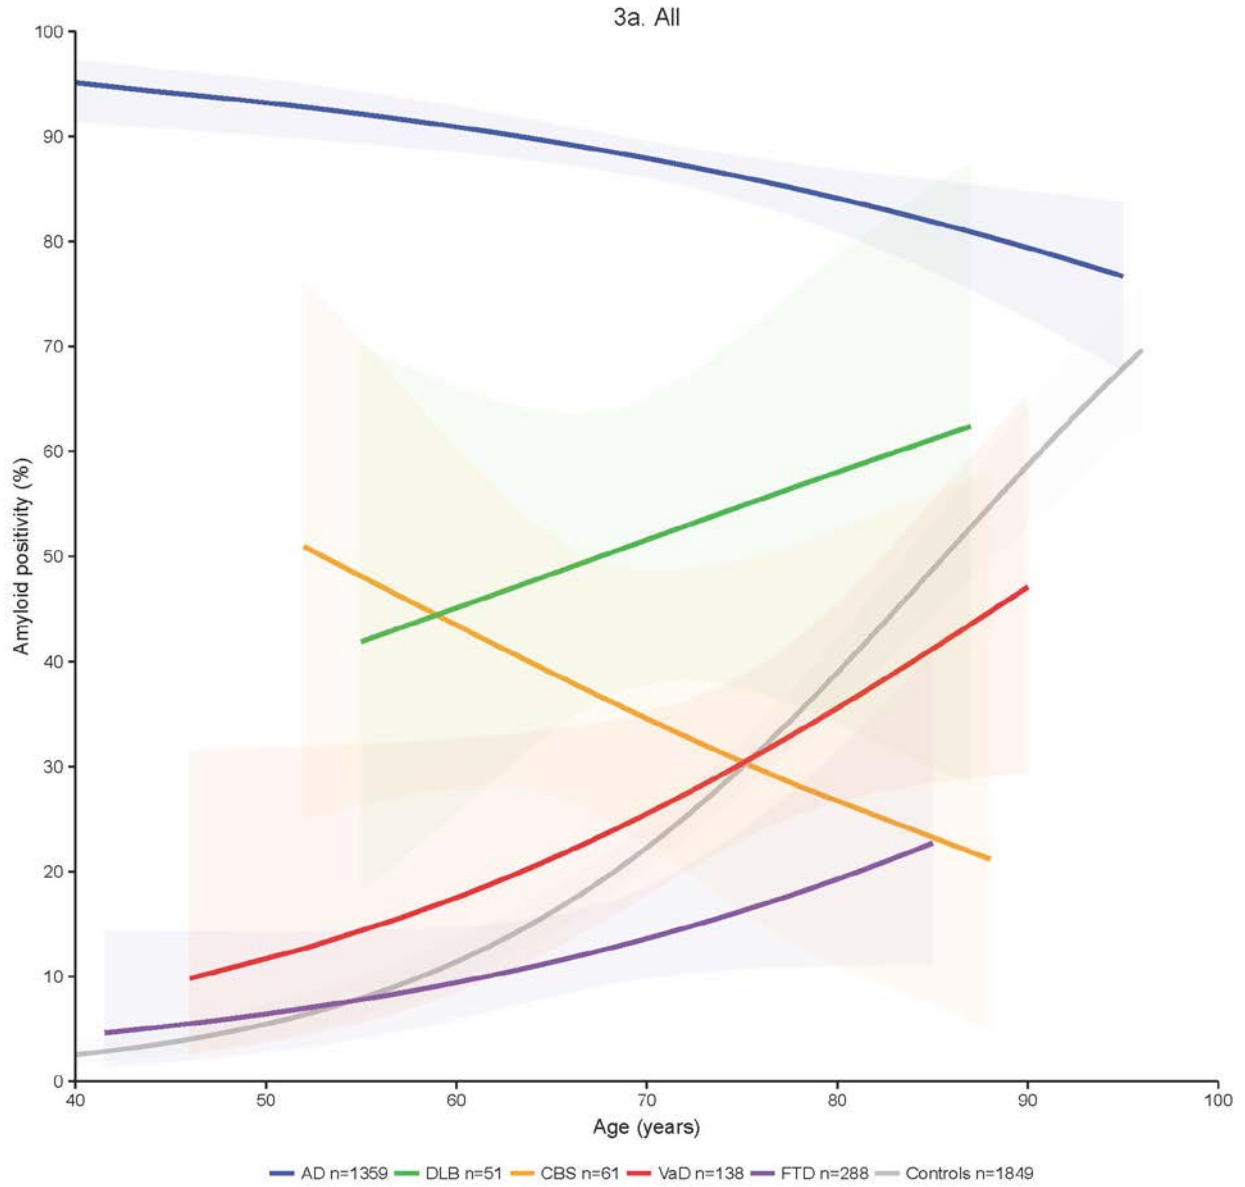

## B. Amyloid PET vs amyloid assessment at autopsy

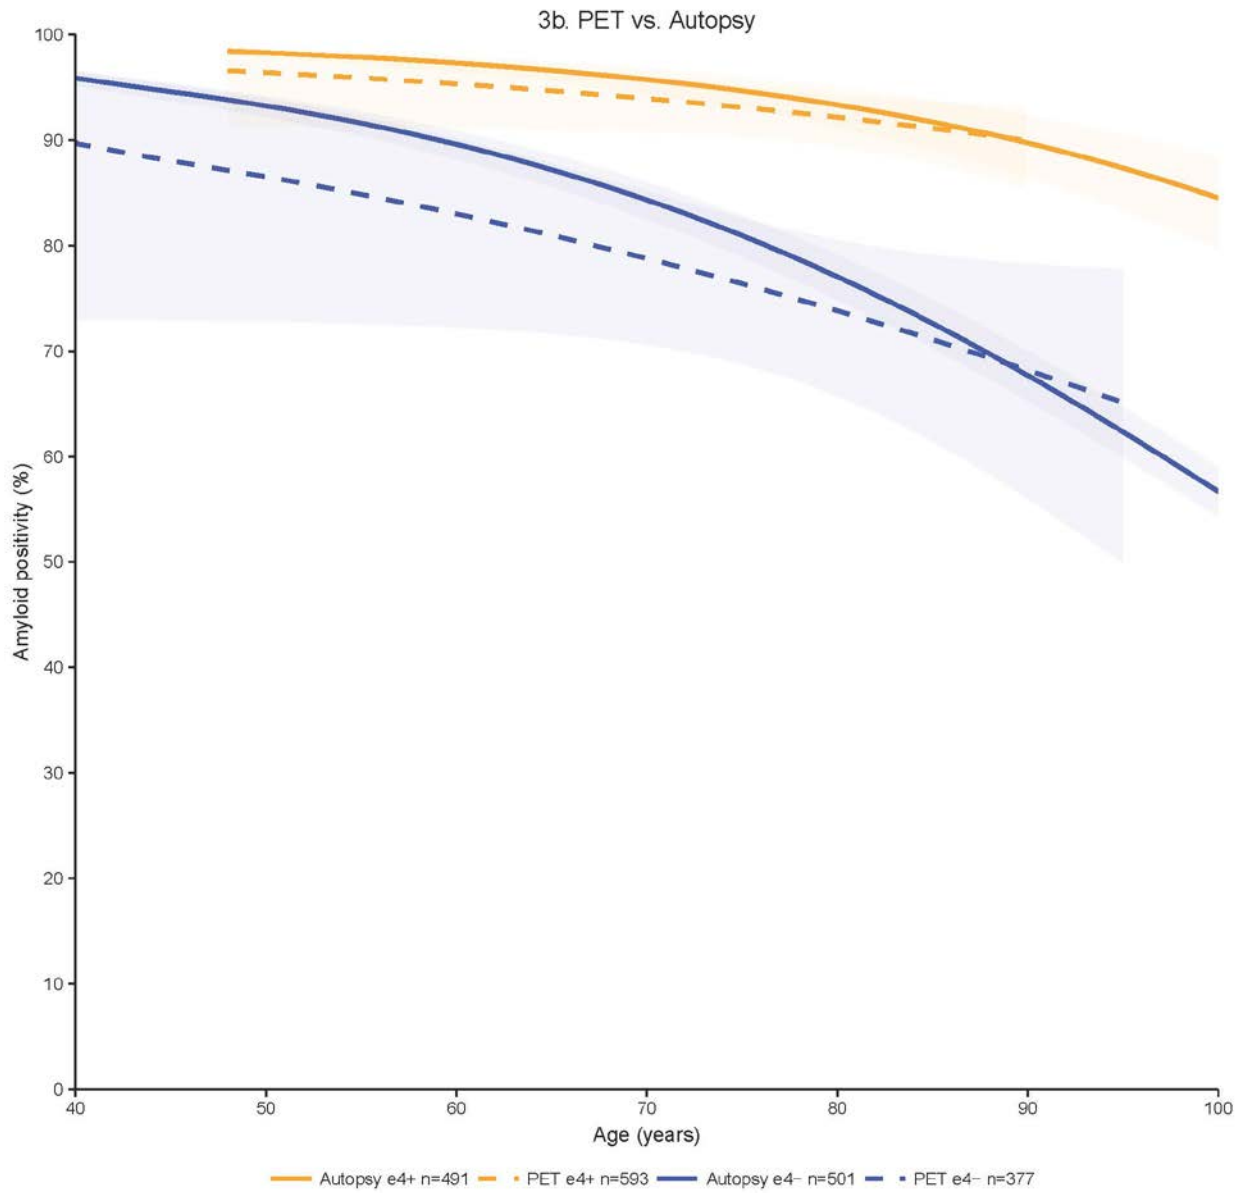

### C. APOE e4 positives

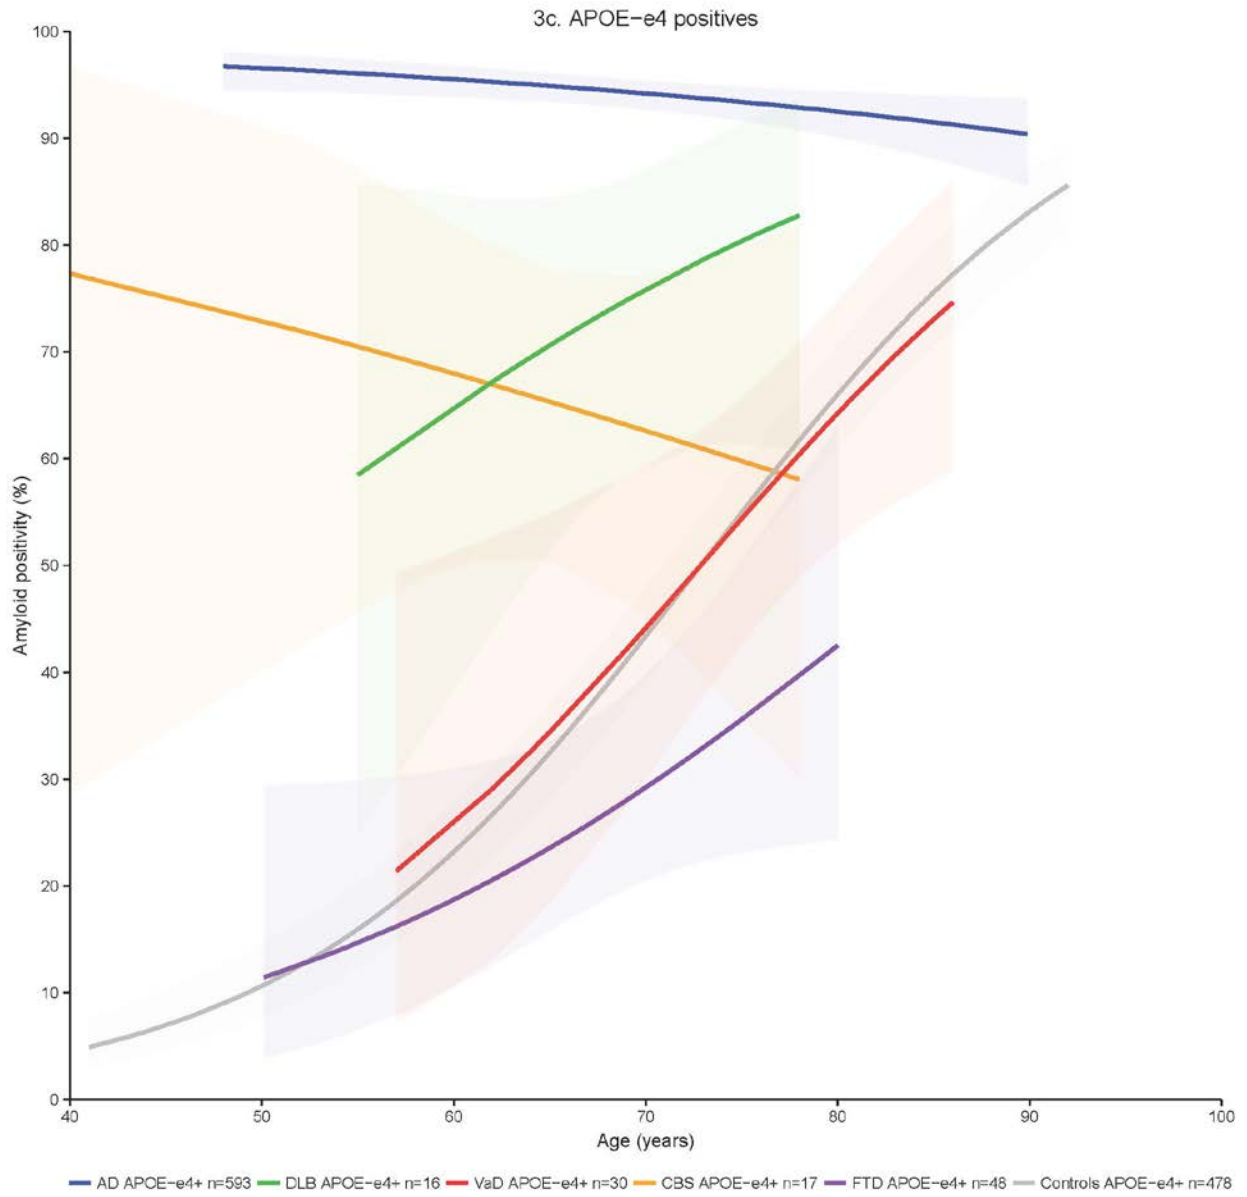

## D. APOE e4 negatives

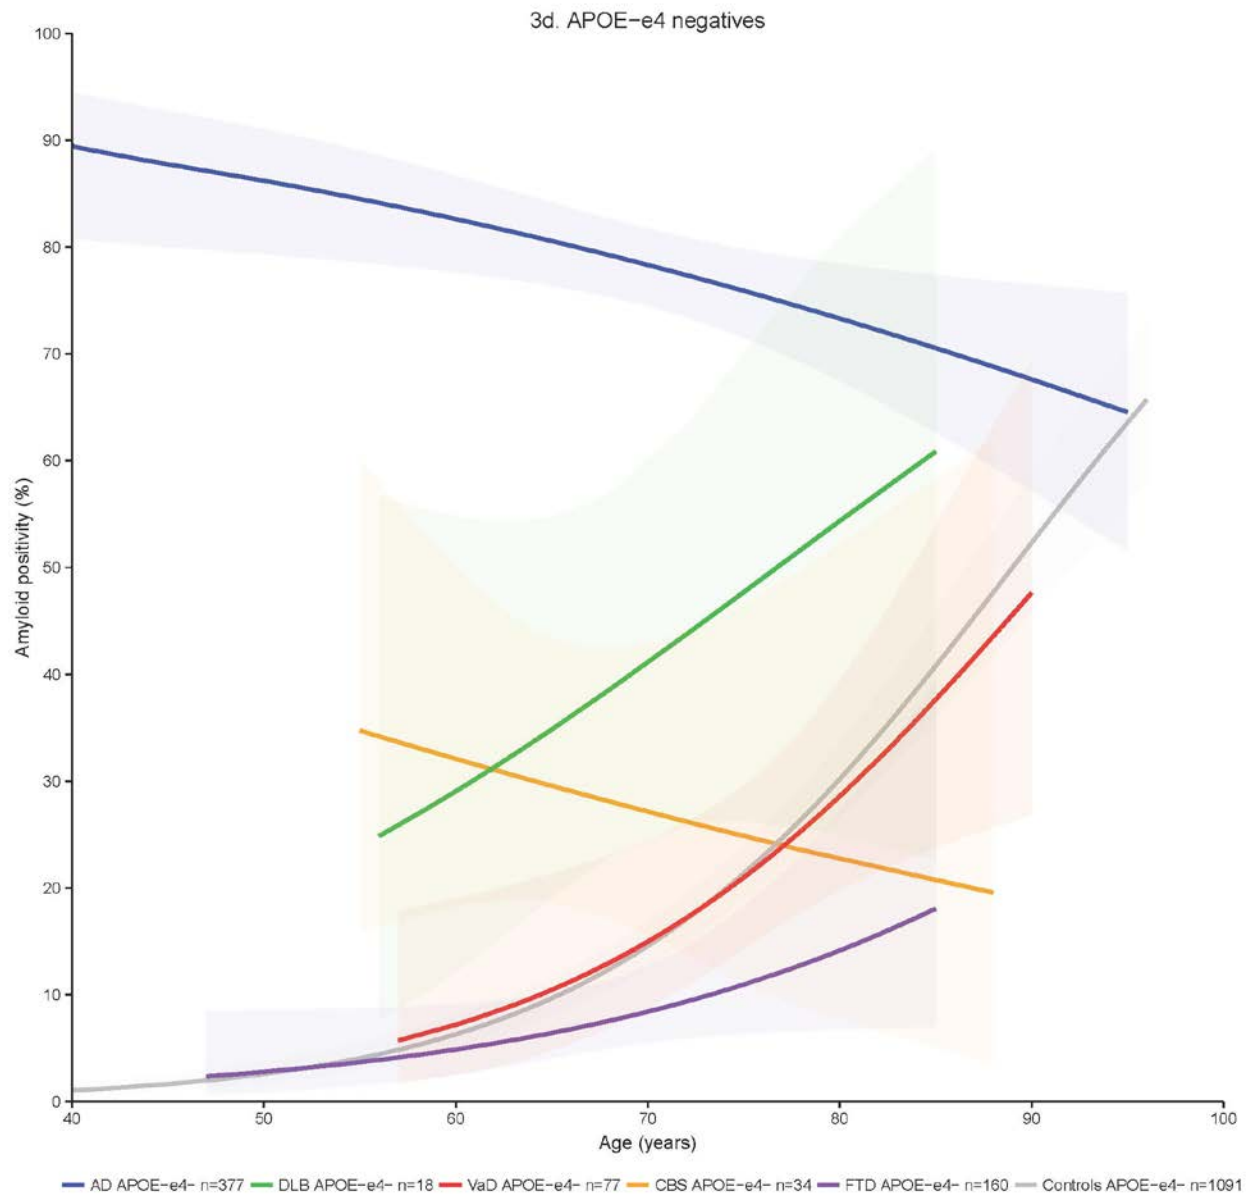

eFigures 4 A-D are similar to Figure 1 A-D, but now include 95% confidence intervals as generated with generalized estimating equation models. The models included amyloid status (+ or -), age, diagnosis, an interaction between age and diagnosis, and were adjusted for study effects. The curves were plotted using the point estimates generated by generalized estimating equations and represent the prevalence of positive amyloid PET scans for the different diagnostic groups as a function of age (the curves are within the age limits of the diagnostic groups).



## **eMethods. ADNI protocol**

Parts of the data used in the preparation of this article were obtained from the Alzheimer's Disease Neuroimaging Initiative (ADNI) database ([adni.loni.usc.edu](http://adni.loni.usc.edu)). The ADNI was launched in 2003 by the National Institute on Aging (NIA), the National Institute of Biomedical Imaging and Bioengineering (NIBIB), the Food and Drug Administration (FDA), private pharmaceutical companies and non-profit organizations, as a \$60 million, 5- year public-private partnership. The primary goal of ADNI has been to test whether serial magnetic resonance imaging (MRI), positron emission tomography (PET), other biological markers, and clinical and neuropsychological assessment can be combined to measure the progression of mild cognitive impairment (MCI) and early Alzheimer's disease (AD). Determination of sensitive and specific markers of very early AD progression is intended to aid researchers and clinicians to develop new treatments and monitor their effectiveness, as well as lessen the time and cost of clinical trials.

The Principal Investigator of this initiative is Michael W. Weiner, MD, VA Medical Center and University of California – San Francisco. ADNI is the result of efforts of many co-investigators from a broad range of academic institutions and private corporations, and subjects have been recruited from over 50 sites across the U.S. and Canada. The initial goal of ADNI was to recruit 800 subjects but ADNI has been followed by ADNI-GO and ADNI-2. To date these three protocols have recruited over 1500 adults, ages 55 to 90, to participate in the research, consisting of cognitively normal older individuals, people with early or late MCI, and people with early AD. The follow up duration of each group is specified in the protocols for ADNI-1, ADNI-2 and ADNI-GO. Subjects originally recruited for ADNI-1 and ADNI-GO had the option to be followed in ADNI-2. For up-to-date information, see [www.adni-info.org](http://www.adni-info.org).

## eREFERENCES

1. Villemagne VL, Burnham S, Bourgeat P, et al. Amyloid beta deposition, neurodegeneration, and cognitive decline in sporadic Alzheimer's disease: a prospective cohort study. *Lancet neurol.* 2013;12(4):357-367.
2. Ossenkoppele R, Zwan MD, Tolboom N, et al. Amyloid burden and metabolic function in early-onset Alzheimer's disease: parietal lobe involvement. *Brain.* 2012;135(Pt 7):2115-2125.
3. Ossenkoppele R, Prins ND, Pijnenburg YA, et al. Impact of molecular imaging on the diagnostic process in a memory clinic. *Alzheimer Dement.* 2013;9(4):414-421.
4. Landau SM, Lu M, Joshi AD, et al. Comparing positron emission tomography imaging and cerebrospinal fluid measurements of beta-amyloid. *Ann Neurol.* 2013;74(6):826-836.
5. Jack CR, Jr., Lowe VJ, Weigand SD, et al. Serial PIB and MRI in normal, mild cognitive impairment and Alzheimer's disease: implications for sequence of pathological events in Alzheimer's disease. *Brain.* 2009;132(Pt 5):1355-1365.
6. Villemagne VL, Pike KE, Chetelat G, et al. Longitudinal assessment of Abeta and cognition in aging and Alzheimer disease. *Ann Neurol.* 2011;69(1):181-192.
7. Rowe CC, Ng S, Ackermann U, et al. Imaging beta-amyloid burden in aging and dementia. *Neurology.* 2007;68(20):1718-1725.
8. Ong K, Villemagne VL, Bahar-Fuchs A, et al. (18)F-florbetaben Abeta imaging in mild cognitive impairment. *Alzheimer Res Ther.* 2013;5(1):4.
9. Leyton CE, Villemagne VL, Savage S, et al. Subtypes of progressive aphasia: application of the International Consensus Criteria and validation using beta-amyloid imaging. *Brain.* 2011;134(Pt 10):3030-3043.
10. Choo IH, Lee DY, Kim JW, et al. Relationship of amyloid-beta burden with age-at-onset in Alzheimer disease. *Am J Geriatr Psychiatry.* 2011;19(7):627-634.
11. de Souza LC, Corlier F, Habert MO, et al. Similar amyloid-beta burden in posterior cortical atrophy and Alzheimer's disease. *Brain.* 2011;134(Pt 7):2036-2043.
12. Roe CM, Mintun MA, Ghoshal N, et al. Alzheimer disease identification using amyloid imaging and reserve variables: proof of concept. *Neurology.* 2010;75(1):42-48.
13. Foster ER, Campbell MC, Burack MA, et al. Amyloid imaging of Lewy body-associated disorders. *Mov Disord.* 2010;25(15):2516-2523.
14. Lee JH, Kim SH, Kim GH, et al. Identification of pure subcortical vascular dementia using 11C-Pittsburgh compound B. *Neurology.* 2011;77(1):18-25.
15. Barthel H, Gertz HJ, Dresel S, et al. Cerebral amyloid-beta PET with florbetaben (18F) in patients with Alzheimer's disease and healthy controls: a multicentre phase 2 diagnostic study. *Lancet neurol.* 2011;10(5):424-435.
16. Nelissen N, Vandenbulcke M, Fannes K, et al. Abeta amyloid deposition in the language system and how the brain responds. *Brain.* 2007;130(Pt 8):2055-2069.
17. Drzezga A, Grimmer T, Henriksen G, et al. Imaging of amyloid plaques and cerebral glucose metabolism in semantic dementia and Alzheimer's disease. *NeuroImage.* 2008;39(2):619-633.
18. Drzezga A, Grimmer T, Henriksen G, et al. Effect of APOE genotype on amyloid plaque load and gray matter volume in Alzheimer disease. *Neurology.* 2009;72(17):1487-1494.
19. Sanchez-Juan P, Ghosh PM, Hagen J, et al. Practical utility of amyloid and FDG-PET in an academic dementia center. *Neurology.* 2014;82(3):230-238.

20. Vandenberghe R, Van Laere K, Ivanoiu A, et al. 18F-flutemetamol amyloid imaging in Alzheimer disease and mild cognitive impairment: a phase 2 trial. *Ann Neurol*. 2010;68(3):319-329.
21. Banzo I, Jimenez-Bonilla J, Ortega-Nava F, et al. Amyloid imaging with (11)C-PIB PET/CT and glucose metabolism with (18)F-FDG PET/CT in a study on cognitive impairment in the clinical setting. *Nucl Med Commun*. 2014;35(3):238-244.
22. Mok V, Wong KK, Xiong Y, et al. Cortical and frontal atrophy are associated with cognitive impairment in age-related confluent white-matter lesion. *J neurol, neurosurg psychiatr*. 2011;82(1):52-57.
23. Camus V, Payoux P, Barre L, et al. Using PET with 18F-AV-45 (florbetapir) to quantify brain amyloid load in a clinical environment. *Eur J nucl med mol imag*. 2012;39(4):621-631.
24. Rosario BL, Weissfeld LA, Laymon CM, et al. Inter-rater reliability of manual and automated region-of-interest delineation for PiB PET. *NeuroImage*. 2011;55(3):933-941.
25. Frings L, Spehl TS, Weber WA, Hull M, Meyer PT. Amyloid-beta load predicts medial temporal lobe dysfunction in Alzheimer dementia. *J nucl med*. 2013;54(11):1909-1914.
26. Newberg AB, Arnold SE, Wintering N, Rovner BW, Alavi A. Initial clinical comparison of 18F-florbetapir and 18F-FDG PET in patients with Alzheimer disease and controls. *J nucl med*. 2012;53(6):902-907.
27. Frederiksen KS, Hasselbalch SG, Hejl AM, Law I, Hojgaard L, Waldemar G. Added Diagnostic Value of (11)C-PiB-PET in Memory Clinic Patients with Uncertain Diagnosis. *Dement Geriatr Cogn Dis Extra*. 2012;2(1):610-621.
28. Fleisher AS, Chen K, Liu X, et al. Apolipoprotein E epsilon4 and age effects on florbetapir positron emission tomography in healthy aging and Alzheimer disease. *Neurobiol aging*. 2013;34(1):1-12.
29. Grundman M, Pontecorvo MJ, Salloway SP, et al. Potential impact of amyloid imaging on diagnosis and intended management in patients with progressive cognitive decline. *Alzheimer dis assoc*. 2013;27(1):4-15.
30. Wolk DA, Zhang Z, Boudhar S, Clark CM, Pontecorvo MJ, Arnold SE. Amyloid imaging in Alzheimer's disease: comparison of florbetapir and Pittsburgh compound-B positron emission tomography. *J neurol, neurosurg psychiatr*. 2012;83(9):923-926.
31. Forsberg A, Engler H, Blomquist G, Langstrom B, Nordberg A. The use of PIB-PET as a dual pathological and functional biomarker in AD. *Biochim Biophys Acta*. 2012;1822(3):380-385.
32. Scheinin NM, Aalto S, Koikkalainen J, et al. Follow-up of [11C]PIB uptake and brain volume in patients with Alzheimer disease and controls. *Neurology*. 2009;73(15):1186-1192.
33. La Joie R, Perrotin A, Barre L, et al. Region-specific hierarchy between atrophy, hypometabolism, and beta-amyloid (A $\beta$ ) load in Alzheimer's disease dementia. *The J nucl med*. 2012;32(46):16265-16273.
34. Morris JC, Roe CM, Grant EA, et al. Pittsburgh compound B imaging and prediction of progression from cognitive normality to symptomatic Alzheimer disease. *Arch neurol*. 2009;66(12):1469-1475.
35. Lehmann M, Ghosh PM, Madison C, et al. Greater medial temporal hypometabolism and lower cortical amyloid burden in ApoE4-positive AD patients. *J neurol, neurosurg psychiatr*. 2014;85(3):266-273.

36. Cohen AD, Mowrey W, Weissfeld LA, et al. Classification of amyloid-positivity in controls: comparison of visual read and quantitative approaches. *NeuroImage*. 2013;71:207-215.
37. Ossenkoppele R, Madison C, Oh H, Wirth M, van Berckel BN, Jagust WJ. Is verbal episodic memory in elderly with amyloid deposits preserved through altered neuronal function? *Cereb cortex*. 2014;24(8):2210-2218.
38. Madsen K, Hasselbalch BJ, Frederiksen KS, et al. Lack of association between prior depressive episodes and cerebral [11C]PiB binding. *Neurobiol aging*. 2012;33(10):2334-2342.
39. Rodrigue KM, Kennedy KM, Devous MD, Sr., et al. beta-Amyloid burden in healthy aging: regional distribution and cognitive consequences. *Neurology*. 2012;78(6):387-395.
40. Vandembroucke JP, von Elm E, Altman DG, et al. Strengthening the Reporting of Observational Studies in Epidemiology (STROBE): explanation and elaboration. *Epidemiology*. 2007;18(6):805-835.
41. Whiting P, Rutjes AW, Reitsma JB, Bossuyt PM, Kleijnen J. The development of QUADAS: a tool for the quality assessment of studies of diagnostic accuracy included in systematic reviews. *BMC Med Res Methodol*. 2003;3:25.
